# Supplementary material for: Tauopathy-associated tau modifications selectively impact neurodegeneration and mitophagy in a novel C. elegans single-copy transgenic model
Source: PubMed Central journal article supplement (PMC7654055; doi:10.1186/s13024-020-00410-7), 2020-11-09

Supplementary Figure 2

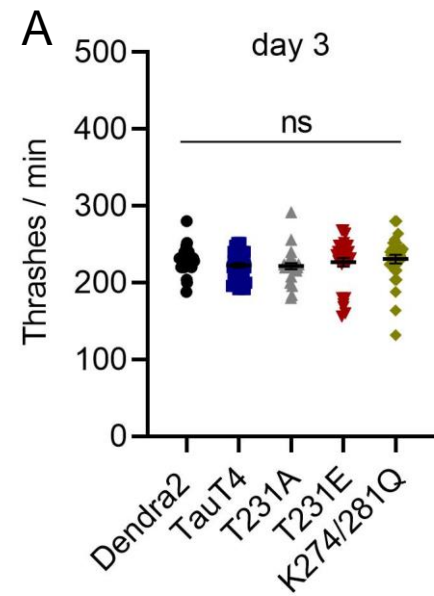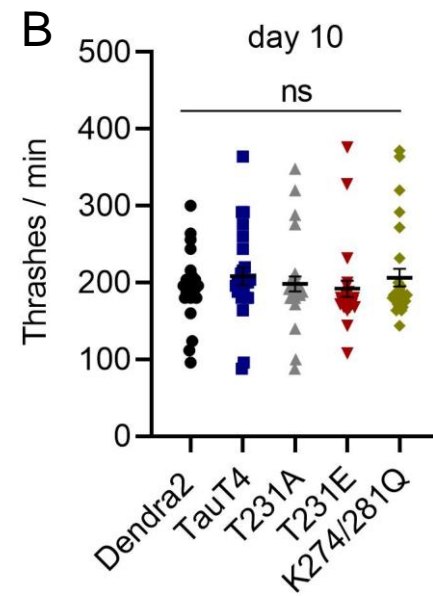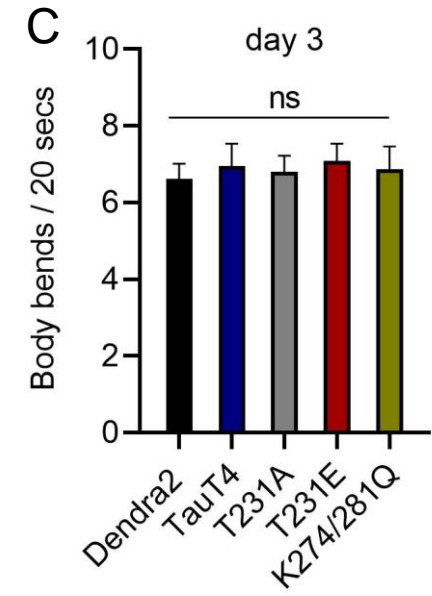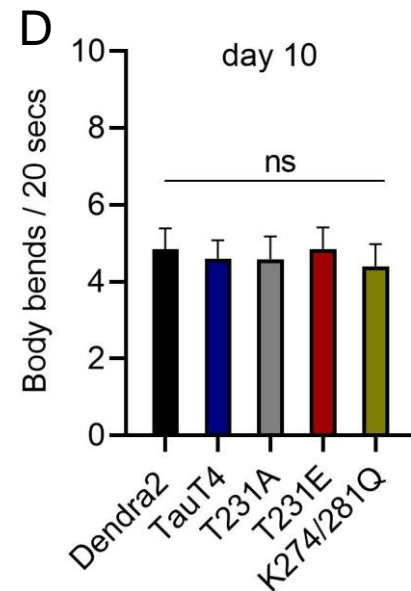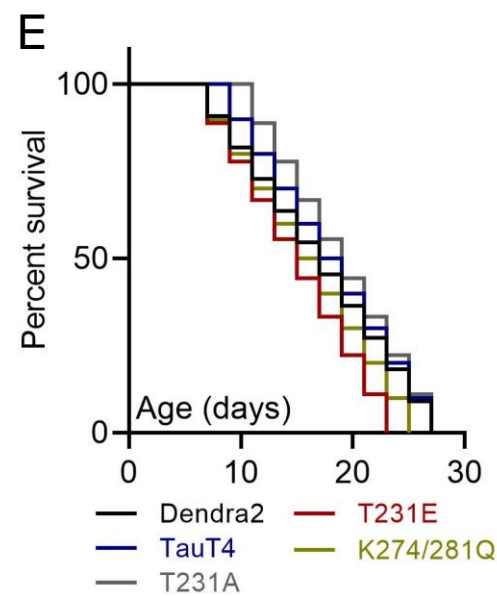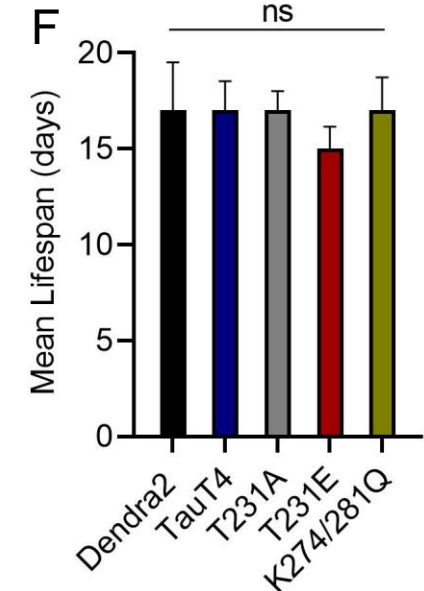

Supplement: 13024_2020_410_MOESM2_ESM.pdf [file 13024_2020_410_MOESM2_ESM.pdf]
