# Supplementary material for: Tauopathy-associated tau modifications selectively impact neurodegeneration and mitophagy in a novel C. elegans single-copy transgenic model
Source: PubMed Central journal article supplement (PMC7654055; doi:10.1186/s13024-020-00410-7), 2020-11-09
Supplement: 13024_2020_410_MOESM4_ESM.pdf [file 13024_2020_410_MOESM4_ESM.pdf]

# Mito-mKeima: a biosensor for assessing mitophagy

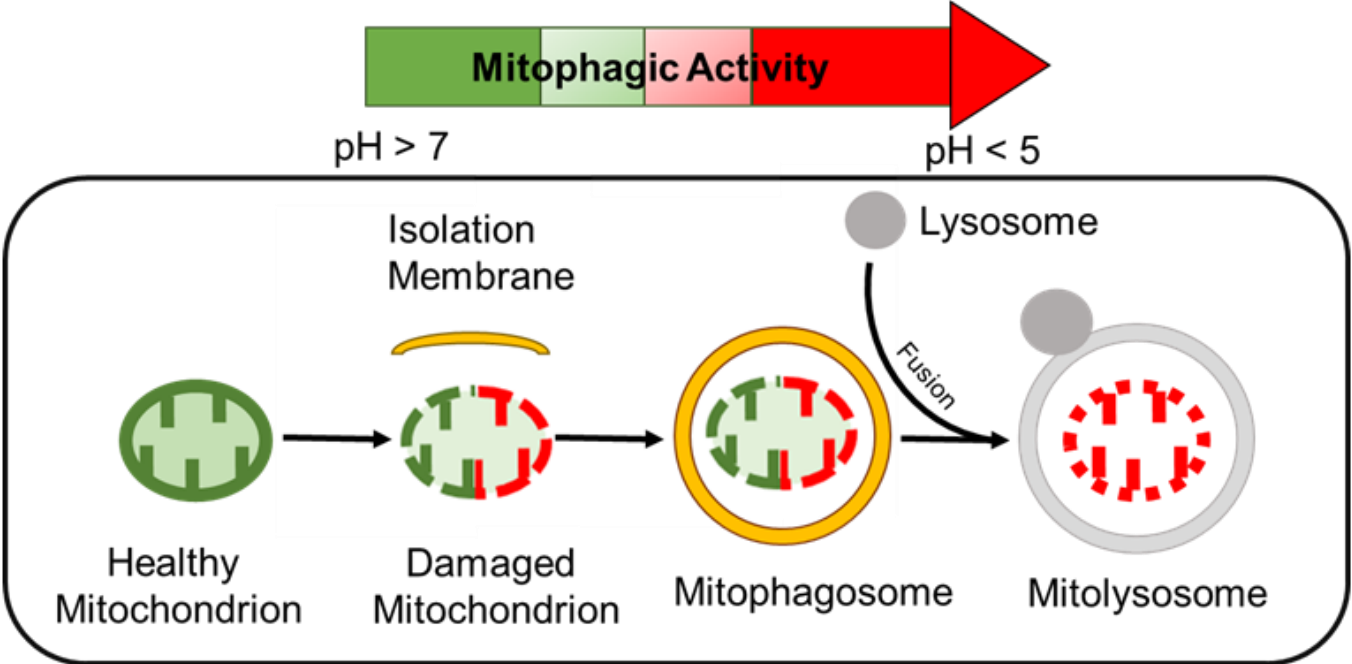

Excitation: 440-nm >> 550-nm      440-nm << 550-nm

Emission:                      600-nm

Emission:                      600-nm
